# Supplementary material for: Effects of Chokeberries (Aronia spp.) on Cytoprotective and Cardiometabolic Markers and Semen Quality in 109 Mildly Hypercholesterolemic Danish Men: A Prospective, Double-Blinded, Randomized, Crossover Trial
Source: MDPI journal article supplement (doi:10.3390/jcm12010373), 2023-01-03
Supplement: s1 [file s1]

## Supplementary Materials

**Supplementary results from the paper: “The health effects of chokeberries (*Aronia* spp.) on a wide range of health markers in 109 mildly hypercholesterolemic Danish men: a prospective, double-blinded, randomized, crossover trial”**

Table S1: Cross-over analysis on the effects of placebo (90 days) and Aronia powder administration (90 days) on blood levels of SOD, CAT, Isoprostanes, Haemoglobin A1c and High Sensitive C-reactive Protein. The placebo and Aronia periods are separated by a 90 day washout period. Means represent follow-up measurements. (CI = Coefficient of variation).

| Variable                              | Treatment order     | n  | Treatment period      |                      | Difference Aronia-Placebo<br>Means (CI) |
|---------------------------------------|---------------------|----|-----------------------|----------------------|-----------------------------------------|
|                                       |                     |    | 1<br>Means (CI)       | 2<br>Means (CI)      |                                         |
| SOD U/ml                              | Aronia then Placebo | 51 | 6.8 (6.1;7.6)         | 5.5 (4.5;6.5)        | 1.3 (0.2;2.5)                           |
|                                       | Placebo then Aronia | 44 | 6.9 (6.0;7.8)         | 4.6 (3.8;5.5)        | -2.3 (-3.7;-0.9)                        |
|                                       | Treatment effect    |    |                       |                      | -0.5 (-1.4;0.4)                         |
| CAT, mU/ml                            | Aronia then Placebo | 51 | 1.6 (1.6;1.7)         | 1.7 (1.6;1.7)        | -0.0 (-0.1;0.0)                         |
|                                       | Placebo then Aronia | 44 | 1.7 (1.6;1.7)         | 1.7 (1.6;1.7)        | -0.0 (-0.1;0.1)                         |
|                                       | Treatment effect    |    |                       |                      | -0.0 (-0.1;0.0)                         |
| Isoprostan,<br>pg/mL                  | Aronia then Placebo | 50 | 957.5 (713.8;1201.1)  | 848.7 (636.6;1060.8) | 108.8 (-116.8;334.4)                    |
|                                       | Placebo then Aronia | 44 | 1173.1 (618.7;1727.6) | 970.9 (356.2;1585.7) | -202.2 (-1052.6;648.2)                  |
|                                       | Treatment effect    |    |                       |                      | -46.7 (-485.1;391.8)                    |
| Haemoglobin<br>A1c                    | Aronia then Placebo | 51 | 34.6 (33.6;35.6)      | 34.6 (33.7;35.6)     | -0.0 (-0.4;0.4)                         |
|                                       | Placebo then Aronia | 44 | 35.8 (34.5;37.0)      | 35.6 (34.5;36.8)     | -0.1 (-0.6;0.3)                         |
|                                       | Treatment effect    |    |                       |                      | -0.1 (-0.4;0.2)                         |
| High Sensitive C-<br>reactive Protein | Aronia then Placebo | 51 | 2.3 (1.2;3.3)         | 2.4 (1.6;3.1)        | -0.1 (-1.2;1.0)                         |
|                                       | Placebo then Aronia | 44 | 1.8 (1.3;2.3)         | 3.0 (0.7;5.4)        | 1.3 (-0.9;3.5)                          |
|                                       | Treatment effect    |    |                       |                      | 0.6 (-0.6;1.8)                          |

Table S2: Cross-over analysis on the effects placebo (90 days) and Aronia powder administration (90 days) on a range of sperm quality parameters. The placebo and Aronia periods are separated by a 90 day washout period. Means represent follow-up measurements. (CI = Coefficient of variation).

| Variable                                                  | Treatment order     | n  | Treatment period   |                    | Difference Aronia-Placebo<br>Means (CI) |
|-----------------------------------------------------------|---------------------|----|--------------------|--------------------|-----------------------------------------|
|                                                           |                     |    | 1<br>Means (CI)    | 2<br>Means (CI)    |                                         |
| Concentration of<br>motile sperm<br>(CMS) (/ml)           | Aronia then Placebo | 33 | 49.5 (35.6;63.3)   | 48.3 (34.1;62.5)   | 1.2 (-6.1;8.5)                          |
|                                                           | Placebo then Aronia | 29 | 51.4 (32.2;70.5)   | 54.3 (32.6;75.9)   | 2.9 (-9.8;15.6)                         |
|                                                           | Treatment effect    |    |                    |                    | 2.0 (-5.2;9.2)                          |
| Total motile<br>sperm count<br>(TMSC)                     | Aronia then Placebo | 33 | 155.4 (92.9;218.0) | 145.6 (97.1;194.2) | 9.8 (-27.3;46.9)                        |
|                                                           | Placebo then Aronia | 29 | 154.0 (92.8;215.3) | 166.9 (86.6;247.2) | 12.9 (-37.4;63.2)                       |
|                                                           | Treatment effect    |    |                    |                    | 11.3 (-19.3;42.0)                       |
| Concentration of<br>progressive<br>motile (CPMS)<br>(/ml) | Aronia then Placebo | 33 | 32.8 (23.7;41.9)   | 30.7 (21.8;39.6)   | 2.1 (-3.4;7.6)                          |
|                                                           | Placebo then Aronia | 29 | 36.3 (22.4;50.3)   | 41.0 (23.4;58.6)   | 4.7 (-5.5;14.9)                         |
|                                                           | Treatment effect    |    |                    |                    | 3.4 (-2.3;9.1)                          |
| Total progressive<br>motile sperm<br>count (TPMSC)        | Aronia then Placebo | 33 | 101.4 (64.3;138.6) | 92.7 (62.2;123.2)  | 8.8 (-11.7;29.2)                        |
|                                                           | Placebo then Aronia | 29 | 109.0 (64.3;153.8) | 128.5 (58.3;198.7) | 19.4 (-31.0;69.9)                       |
|                                                           | Treatment effect    |    |                    |                    | 14.1 (-12.8;41.0)                       |
| Sperm volume<br>(ml)                                      | Aronia then Placebo | 33 | 3.0 (2.6;3.5)      | 3.0 (2.6;3.3)      | 0.1 (-0.2;0.3)                          |
|                                                           | Placebo then Aronia | 29 | 3.1 (2.6;3.6)      | 2.9 (2.4;3.4)      | -0.2 (-0.6;0.2)                         |
|                                                           | Treatment effect    |    |                    |                    | -0.1 (-0.3;0.2)                         |

Table S3: Cross-over analysis on the effects of placebo (90 days) and Aronia powder administration (90 days) on levels of blood glucose, HOMA and systolic/diastolic blood pressure. The placebo and Aronia periods are separated by a 90 day washout period. Means represent follow-up measurements. (CI = Coefficient of variation).

| Variable                                          | Treatment order     | n  | Treatment period    |                     | Difference Aronia-Placebo<br>Means (CI) |
|---------------------------------------------------|---------------------|----|---------------------|---------------------|-----------------------------------------|
|                                                   |                     |    | 1<br>Means (CI)     | 2<br>Means (CI)     |                                         |
| Glucose                                           | Aronia then Placebo | 51 | 5.8 (5.7;6.0)       | 5.8 (5.6;5.9)       | 0.1 (0.0;0.2)                           |
|                                                   | Placebo then Aronia | 44 | 5.9 (5.6;6.1)       | 5.9 (5.6;6.2)       | 0.0 (-0.1;0.2)                          |
|                                                   | Treatment effect    |    |                     |                     | 0.0 (-0.0;0.1)                          |
| HOMA                                              | Aronia then Placebo | 51 | 1.9 (1.6;2.2)       | 1.9 (1.6;2.3)       | -0.0 (-0.2;0.2)                         |
|                                                   | Placebo then Aronia | 44 | 2.2 (1.5;2.9)       | 2.0 (1.4;2.5)       | -0.2 (-0.7;0.2)                         |
|                                                   | Treatment effect    |    |                     |                     | -0.1 (-0.4;0.1)                         |
| Blood pressure,<br>systolic (mmHg),<br>left arm   | Aronia then Placebo | 51 | 127.8 (123.7;132.0) | 130.2 (126.5;134.0) | -2.4 (-4.7;-0.1)                        |
|                                                   | Placebo then Aronia | 43 | 124.9 (120.9;129.0) | 128.1 (123.8;132.4) | 3.2 (0.9;5.4)                           |
|                                                   | Treatment effect    |    |                     |                     | 0.4 (-1.2;2.0)                          |
| Blood pressure,<br>diastolic (mmHg),<br>left arm  | Aronia then Placebo | 51 | 84.3 (81.6;87.0)    | 86.5 (83.8;89.1)    | -2.2 (-3.5;-0.9)                        |
|                                                   | Placebo then Aronia | 43 | 83.4 (80.0;86.8)    | 84.4 (81.0;87.8)    | 0.9 (-0.6;2.4)                          |
|                                                   | Treatment effect    |    |                     |                     | -0.6 (-1.6;0.3)                         |
| Blood pressure,<br>systolic (mmHg),<br>right arm  | Aronia then Placebo | 50 | 129.3 (125.3;133.4) | 130.0 (126.4;133.5) | -0.6 (-2.8;1.5)                         |
|                                                   | Placebo then Aronia | 43 | 126.6 (122.5;130.7) | 128.3 (124.4;132.3) | 1.8 (-0.2;3.8)                          |
|                                                   | Treatment effect    |    |                     |                     | 0.6 (-0.9;2.0)                          |
| Blood pressure,<br>diastolic (mmHg),<br>right arm | Aronia then Placebo | 50 | 85.5 (82.8;88.2)    | 86.6 (84.1;89.1)    | -1.1 (-2.4;0.2)                         |
|                                                   | Placebo then Aronia | 43 | 83.5 (80.4;86.6)    | 84.7 (81.5;87.8)    | 1.2 (-0.2;2.6)                          |
|                                                   | Treatment effect    |    |                     |                     | 0.0 (-0.9;1.0)                          |
